# Supplementary material for: Arctic seabirds and shrinking sea ice: egg analyses reveal the importance of ice-derived resources
Source: PubMed Central journal article supplement (PMC6817817; doi:10.1038/s41598-019-51788-4), 2019-10-28
Supplement: 41598_2019_51788_MOESM1_ESM.pdf [file 41598_2019_51788_MOESM1_ESM.pdf]

# Arctic seabirds and shrinking sea ice: egg analyses reveal the importance of ice-derived resources

Fanny Cusset, Jérôme Fort, Mark Mallory, Birgit Braune, Philippe Massicotte and Guillaume Massé

## Supplementary figures

**S1. (a)** Satellite images of Barrow Strait (Nunavut, Canada) showing ice conditions around Prince Leopold Island (inner red circle) during the breeding season of northern fulmars (NOFU) and thick-billed murres (TBMU) (from EOSIDS Worldview dataset). The outer red circle represents the 100 km radius circle around the colony. Each row represents a key reproductive event for both fulmars and murres, from their arrival at the colony (in early-May and mid-June respectively) to egg-laying (in early-June and early-July respectively) and egg hatching (in end-July for both species). Only fulmars undertake a pre-laying exodus: they leave the colony temporarily between colony attendance and egg-laying. 2010 and 2012 appear as icy years, inversely to 2011 and 2013 during which open water was dominant. **(b)** Daily ice concentrations in the 100 km radius circle around Prince Leopold Island between May and September for the 2010-2013 period. Red dots correspond to dates presented above.

**S2.** HBI distributions ( $\text{ng g}^{-1}$  standard) in eggs of thick-billed murres (a) and northern fulmars (b) ( $n=15$  per year and species) collected on Prince Leopold Island for four consecutive years with contrasted ice conditions (2010-2013).

**S3.** HBI concentrations (Mean  $\pm$  SE, expressed in  $\text{ng g}^{-1}$  standard) in eggs of thick-billed murres (top) and northern fulmars (bottom) between 2010 and 2013. IP<sub>25</sub> and diene (dark and light grey respectively) are ice biomarkers and triene (black) is a pelagic biomarker.

**S4.** Stable isotope results (Mean  $\pm$  SD) for eggs of thick-billed murres (TBMU; black circles) and northern fulmars (NOFU; open circles) collected on Prince Leopold Island between 2010 and 2013. Numbers indicate the sampling size for each year and species.

**S5.** Influence of prey consumed by thick-billed murres ( $\delta^{15}\text{N}$ ) on their egg energetic content (kcal).

**S6.** Relationship between volume ( $\text{cm}^3$ ) and energetic content (kcal) in thick-billed murre eggs.

(a)

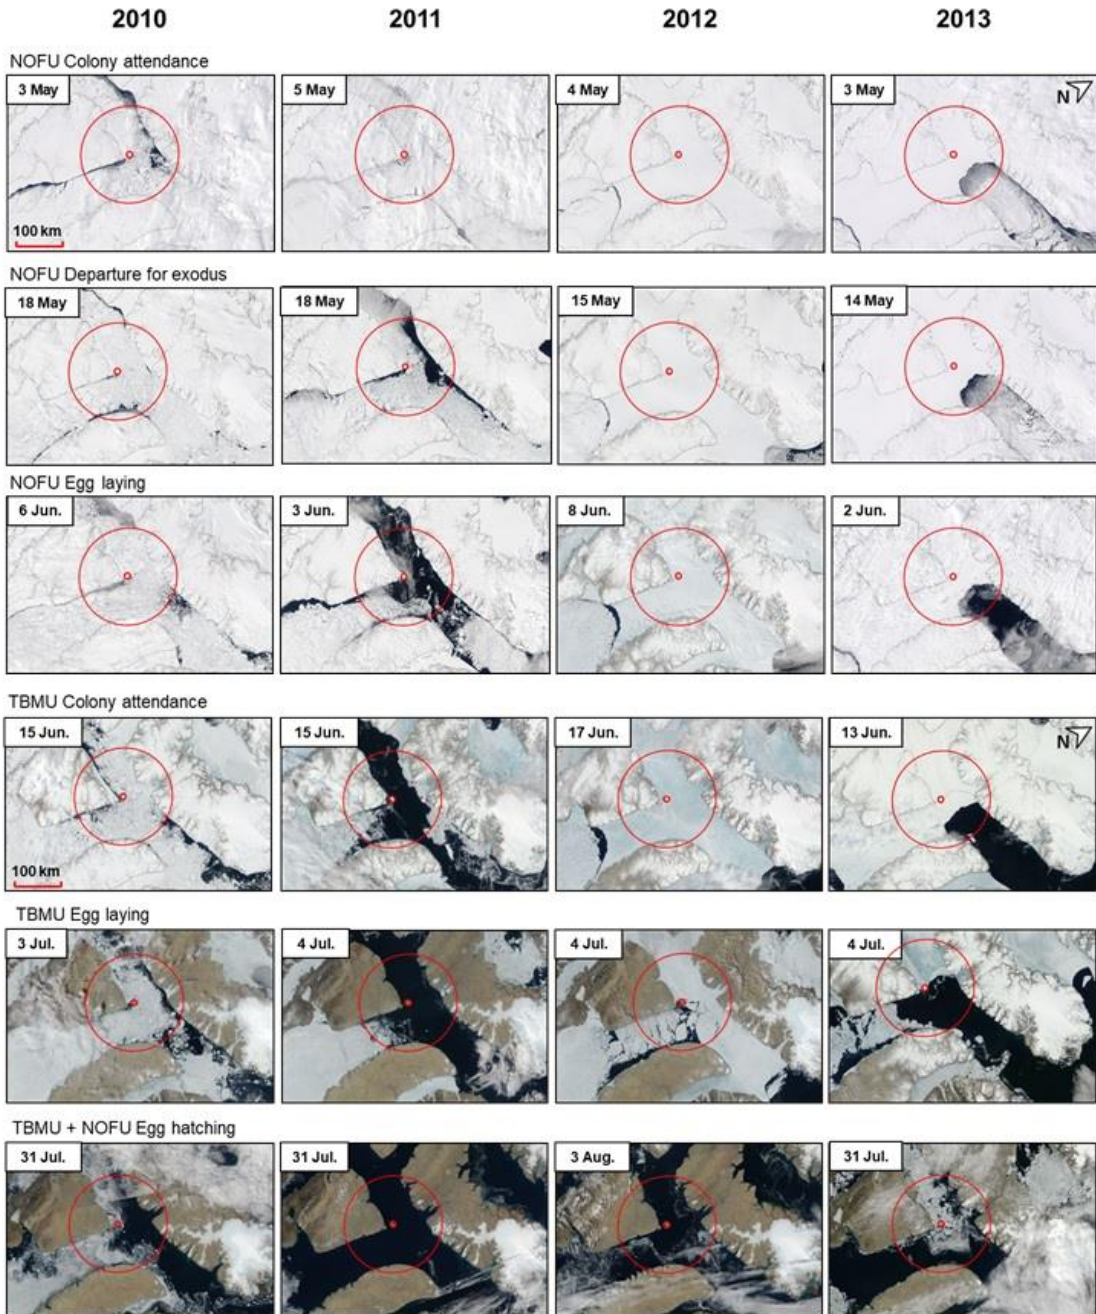

(b)

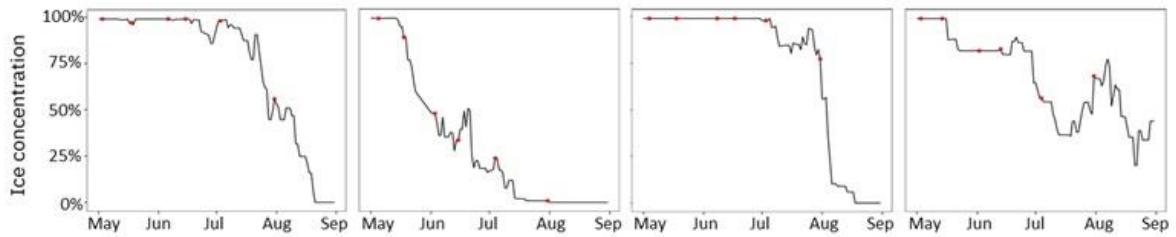

**S1. (a)** Satellite images of Barrow Strait (Nunavut, Canada) showing ice conditions around Prince Leopold Island (inner red circle) during the breeding season of northern fulmars (NOFU) and thick-billed murre (TBMU) (from EOSIDS Worldview dataset). The outer red circle represents the 100 km radius circle around the colony. Each row represents a key reproductive event for both fulmars and murre, from their arrival at the colony (in early-May and mid-June respectively) to egg-laying (in early-June and early-July respectively) and egg hatching (in end-July for both species). Only fulmars undertake a pre-laying exodus: they leave the colony temporarily between colony attendance and egg-laying. 2010 and 2012 appear as icy years, inversely to 2011 and 2013 during which open water was dominant. **(b)** Daily ice concentrations in the 100 km radius circle around Prince Leopold Island between May and September for the 2010-2013 period. Red dots correspond to dates presented above.

a) Thick-billed murre

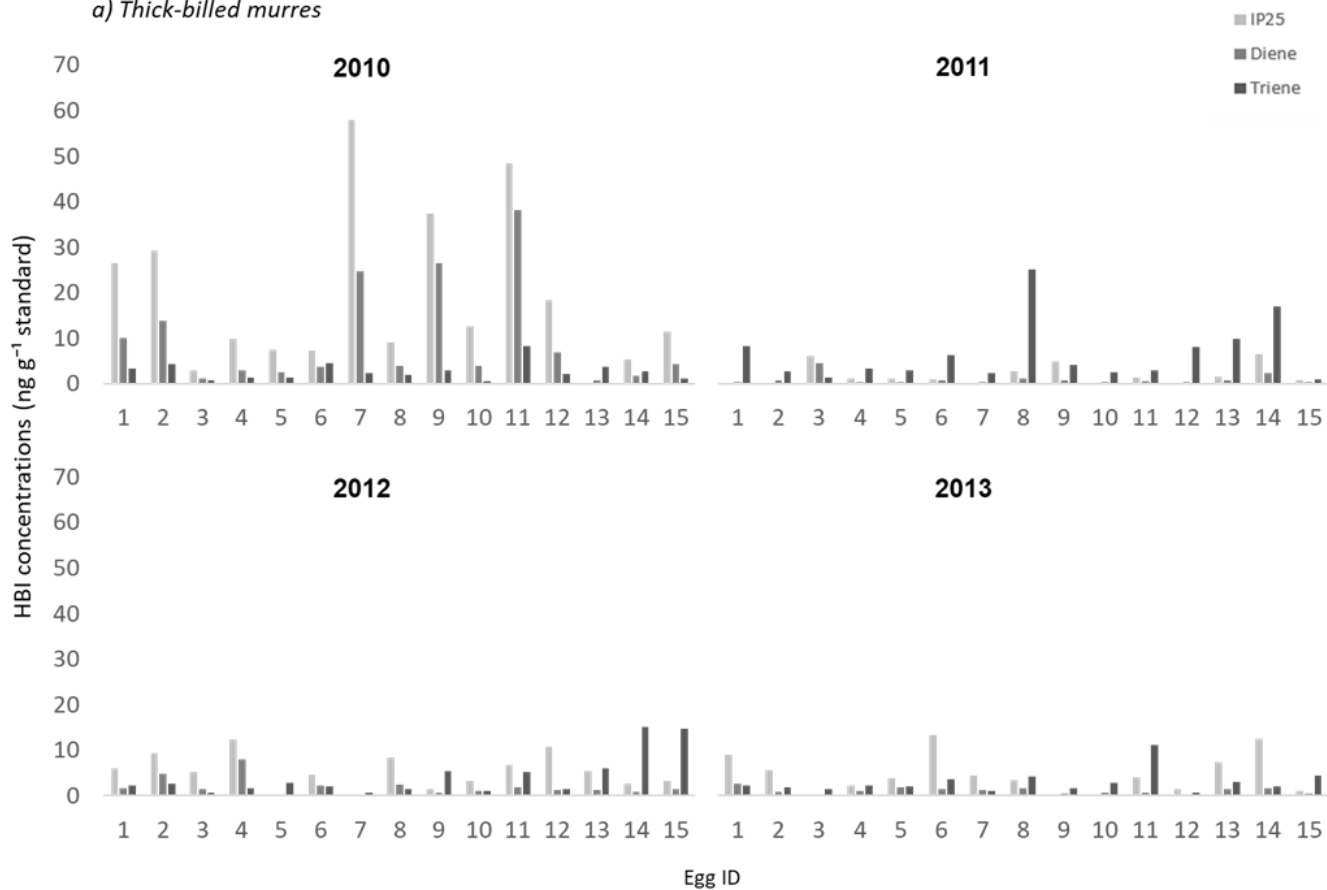

b) Northern fulmars

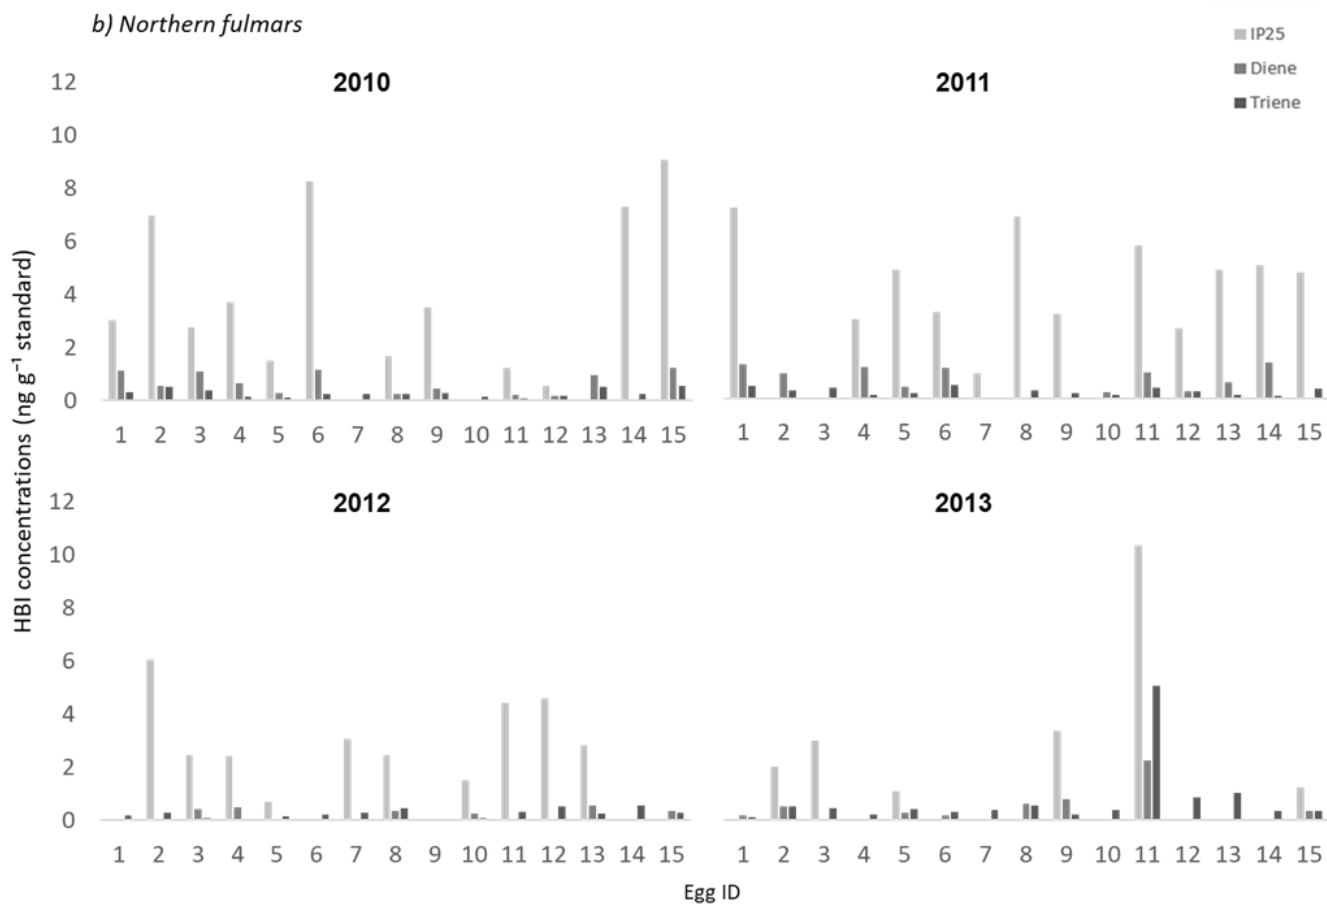

**S2.** HBI distributions (ng g<sup>-1</sup> standard) in eggs of thick-billed murres (top panels) and northern fulmars (bottom panels) (n=15 per year and species) collected on Prince Leopold Island for four consecutive years with contrasted ice conditions (2010-2013).

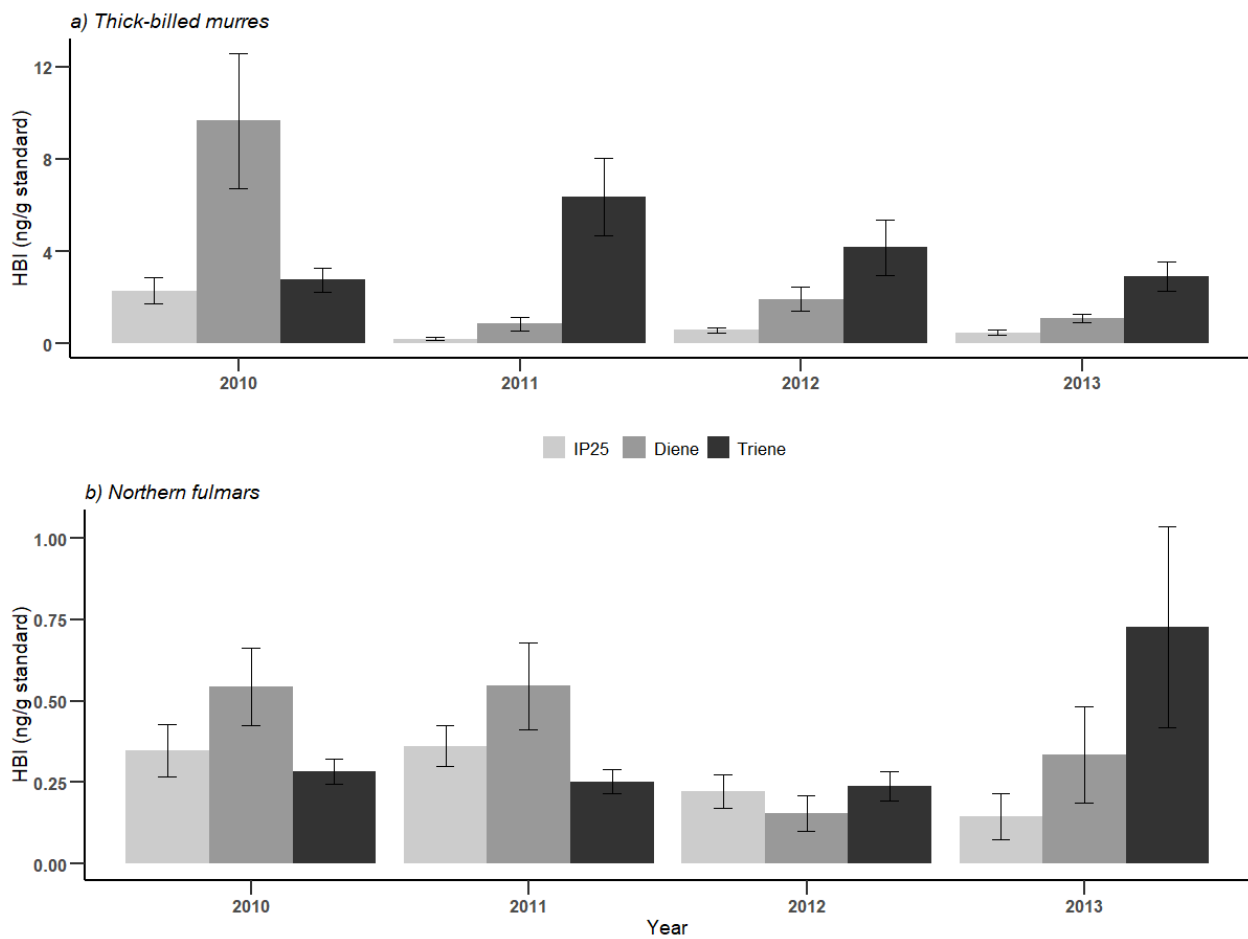

**S3.** HBI concentrations (Mean  $\pm$  SE, expressed in ng g<sup>-1</sup> standard) in eggs of thick-billed murres (a) and northern fulmars (b) between 2010 and 2013. IP<sub>25</sub> and diene (dark and light grey respectively) are ice biomarkers and triene (black) is a pelagic biomarker.

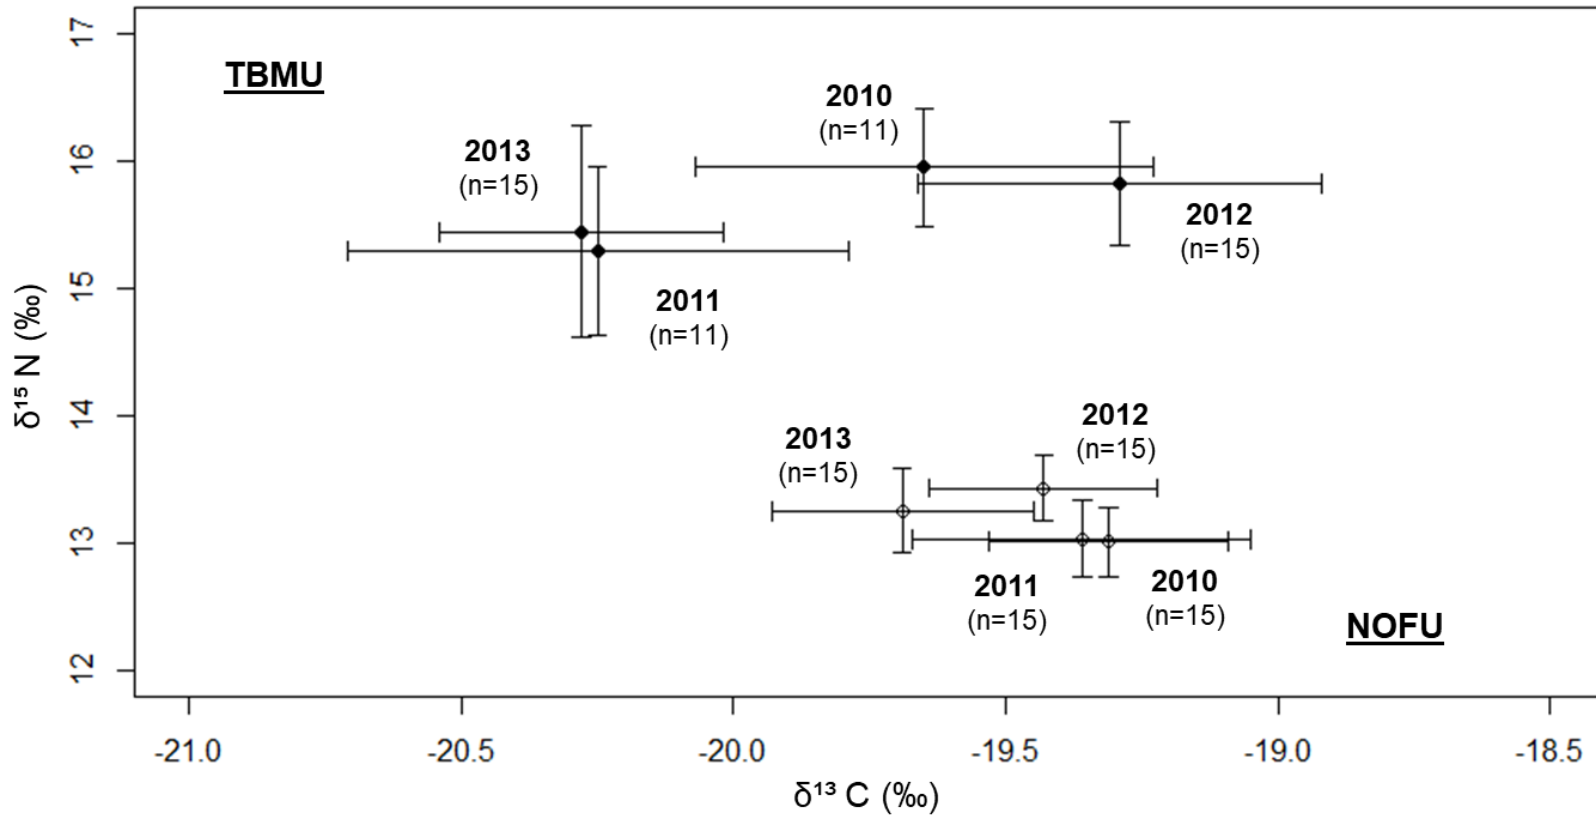

**S4.** Stable isotope results (Mean  $\pm$  SD) for eggs of thick-billed murre (TBMU; black circles) and northern fulmars (NOFU; open circles) collected on Prince Leopold Island between 2010 and 2013. Numbers indicate the sampling size for each year and species.

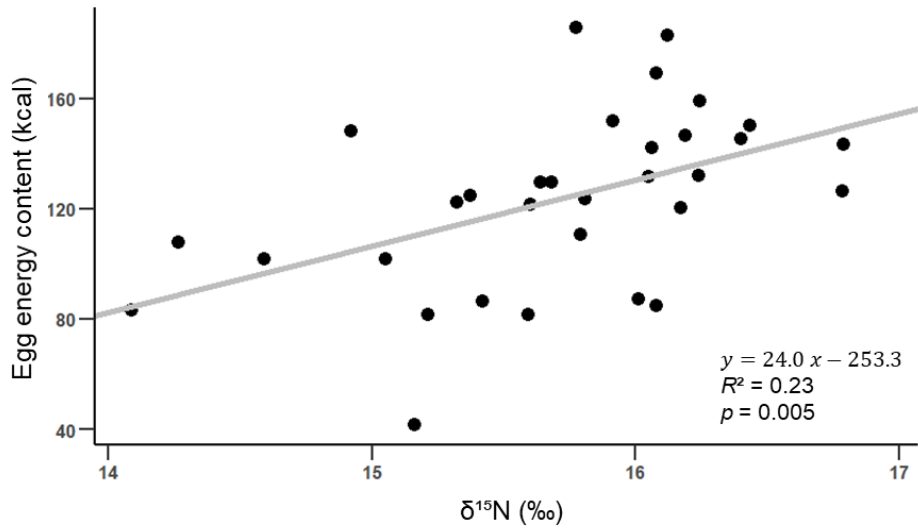

**S5.** Influence of prey consumed by thick-billed murres ( $\delta^{15}\text{N}$ ) on their egg energetic content (kcal).

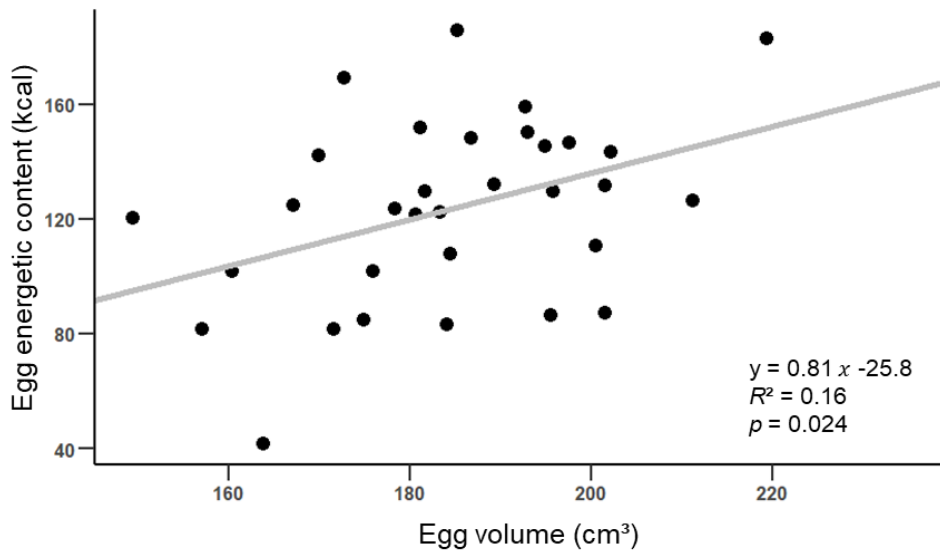

**S6.** Relationship between volume ( $\text{cm}^3$ ) and energetic content (kcal) in thick-billed murre eggs.
